# Supplementary material for: Validation of spectroscopic gas analyzer accuracy using gravimetric standard gas mixtures: Impact of background gas composition on CO 2 quantitation by cavity ring-down spectroscopy
Source: Copernicus journal article supplement (doi:10.5194/amt-2017-54), 2017-05-24
Supplement: Supplementary file [file amt-2017-54-AC1-supplement.pdf]

## Reply to RC2

Jeongsoon Lee (Corresponding author)

leejs@kriss.re.kr

The authors appreciate Dr. Loh's kind consideration of this manuscript. Please find our replies to the referee comments below.

### General Comments

1. The authors present a set of total pressure broadening coefficients (TPBCs) that substantially improve agreement between CRDS determined CO<sub>2</sub> mixing ratios and the mixing ratios assigned to each tank during gravimetric or manometric preparation. However, the use of TPBCs does not reduce the discrepancy to within the World Meteorological Organization's CO<sub>2</sub> inter-laboratory compatibility goal of +/- 0.1 umol/mol (in the Northern Hemisphere, and 0.05 umol/mol in the Southern Hemisphere). As such, I would urge the authors to consider appending something similar to the following to the end of their abstract.

P1, L20: "... instrument calibration, or better still, use standards prepared with ambient air."

Additionally, I would like the authors to consider adding a sentence or two to this effect in their discussion section.

- Thank you for the suggestion. Authors will add sentence as follow.
  - P1, L20: "... Instrument calibration or use standards prepared in same background composition of ambient air.
  - The authors conjecture that major error sources arose from the mole fraction uncertainties of major components, e.g. N<sub>2</sub>, O<sub>2</sub>, Ar and CO<sub>2</sub>, and uncertainty of pressure broadening coefficients. According to this opinion, the authors will add sentences at the end of discussion section as follow.
  - "It is worth noting that the quality of the TPBC correction can be improved further by using quality standards with lower composition uncertainties, including <sup>13</sup>CO<sub>2</sub> isotopologues and precisely measured broadening coefficients that are deduced from advanced line-shape functions such as Galatry and Rautian profiles."
  - With regard to the isotopes ratio, please see the reply for general comment 2.
2. A further comment is that the authors do not mention the isotopic composition of the CO<sub>2</sub> used to prepare their synthetic standards. While I assume all eight standards were prepared

with the same batch of CO<sub>2</sub> (and thus having the same CO<sub>2</sub> isotopic composition), this is worth mentioning (and handling) explicitly (preferably with the  $\delta^{13}\text{CCO}_2$  of the pure CO<sub>2</sub> used). As CRDS is a single line spectroscopic technique, it is inherently isotopologue specific. Therefore, using a pure CO<sub>2</sub> source with a significantly different isotopic composition from the background atmosphere will induce a systematic bias in CRDS determinations of mixing ratio unless this effect is accounted for. The authors already cite Lee et al. (2006), which deals with this question (though for NDIR rather than CRDS (for which the problem is at its most extreme)), so I assume they are familiar with the issue.

- The authors understand this comment is very similar to first specific comment of RC1. The 12/13 ratio of CO<sub>2</sub> raw gas for gravimetric standards was similar to the atmospheric level approximately -11‰. The volumetric standards with prepared with the dry air and high purity N<sub>2</sub> (>99.999%). This suggests similar isotope ratios would occur across the prepared cylinders. For verification (calibration) of prepared gravimetric (volumetric) standards, the CO<sub>2</sub> mole fractions in them were verified by GC-FID, which measured total carbon isotopes. Therefore, the isotope effect were hardly discernable in this study. However, it might be the case that the isotope ratios of CO<sub>2</sub> in the "dry air" can vary or deviate from the CO<sub>2</sub> raw gas to cause some extent of discrepancy in the CRDS response. The authors will add sentences at the end of the section 2.1 as follow.
- The <sup>12</sup>C/<sup>13</sup>C ratio of CO<sub>2</sub> raw gas for the gravimetric standards was similar to the atmospheric level of approximately -11‰, which suggests similar isotope ratios would occur across the prepared cylinders as determined by gravimetry and volumetry. Nevertheless, isotope effects biasing the CRDS response seemed to be hardly discernable in this study because verification (calibration) of the CO<sub>2</sub> mole fractions in the prepared gravimetric (volumetric) standards was carried out by GC-FID, which measured the total carbon isotopes."

### Specific Comments

1. P1 L28, consider inserting 'all' between quantify and its, and remove "considerably"
  - It will be corrected as suggested.
2. P3 L20, gases to become 'gas'
  - It will be corrected as pointed out
